# Supplementary material for: Contrasting ambient fine particles hygroscopicity derived by HTDMA and HR-AMS measurements between summer and winter in urban Beijing
Source: Copernicus journal article supplement (doi:10.5194/acp-2019-583), 2019-06-25
Supplement: Supplementary file 1 [file acp-2019-583-supplement.pdf]

*Supplement of*

Contrasting ambient fine particles hygroscopicity derived by HTDMA  
and HR-AMS measurements between summer and winter in urban  
Beijing

Xinxin Fan et al.

Correspondence to: [fang.zhang@bnu.edu.cn](mailto:fang.zhang@bnu.edu.cn)

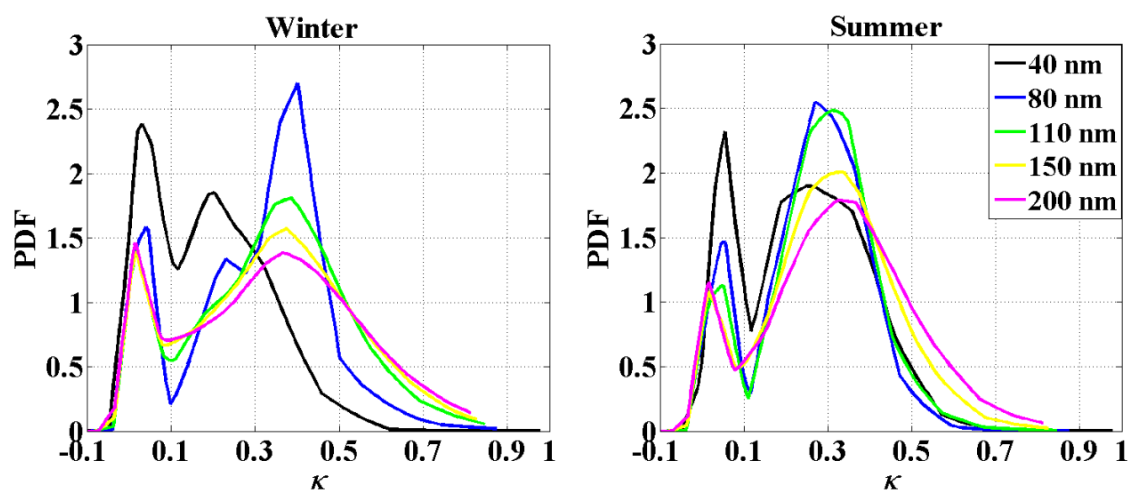

Figure S1. Mean probability density functions of hygroscopicity parameter derived from hygroscopic growth factor for 40, 80, 110, 150, 200 nm in winter and summer period respectively.

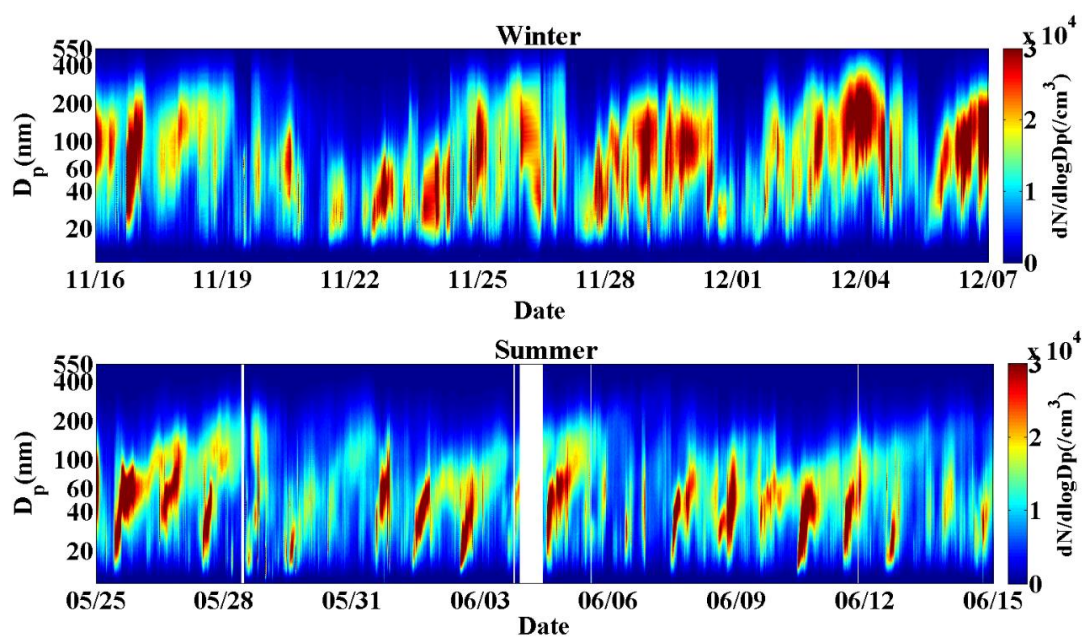

Figure S2. Time series of particle number size distribution in winter and summer period.

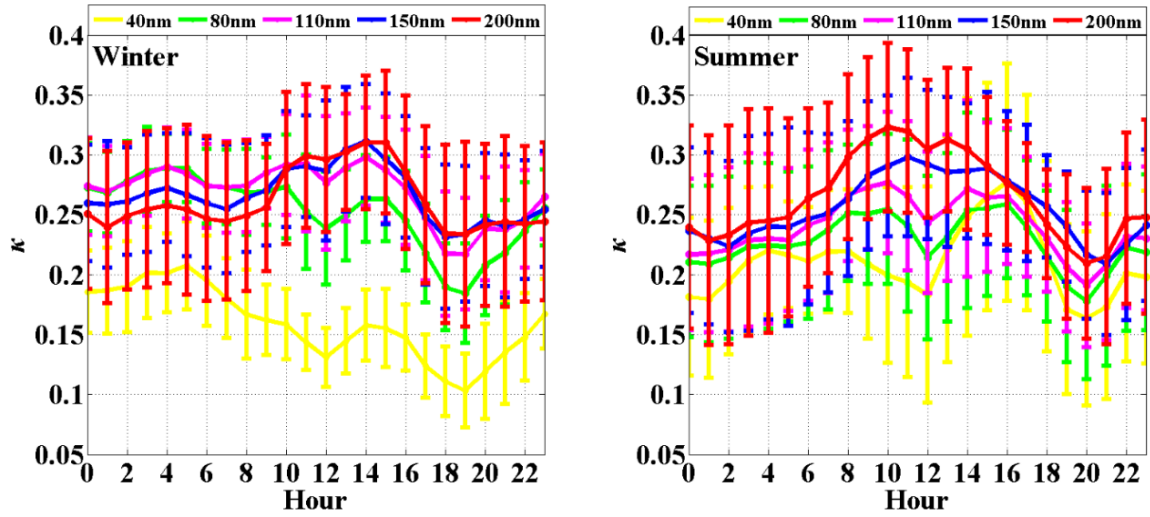

Figure S3. Diurnal variations in the hygroscopicity parameter derived from hygroscopic growth factor for 40, 80, 110, 150, 200 nm in winter and summer period respectively.

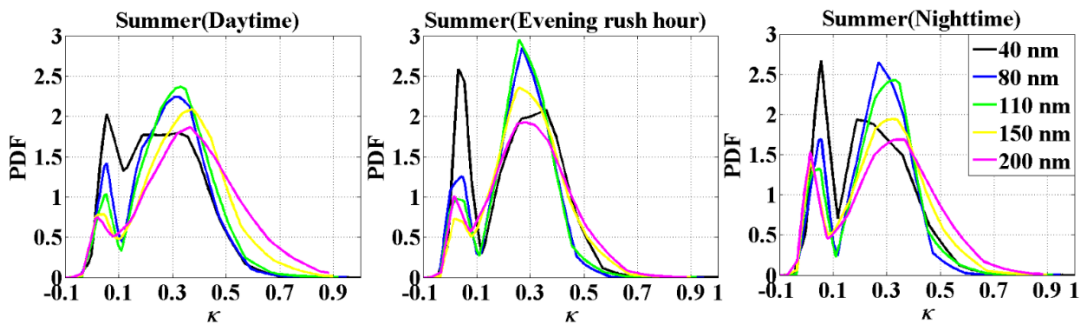

Figure S4. Mean probability density functions of hygroscopicity parameter derived from hygroscopic growth factor for 40, 80, 110, 150, 200 nm during daytime (14:00-19:00 LT), evening rush hour(16:00-20:00 LT), and nighttime (00:00-06:00 LT) under clean and polluted conditions in summer period.

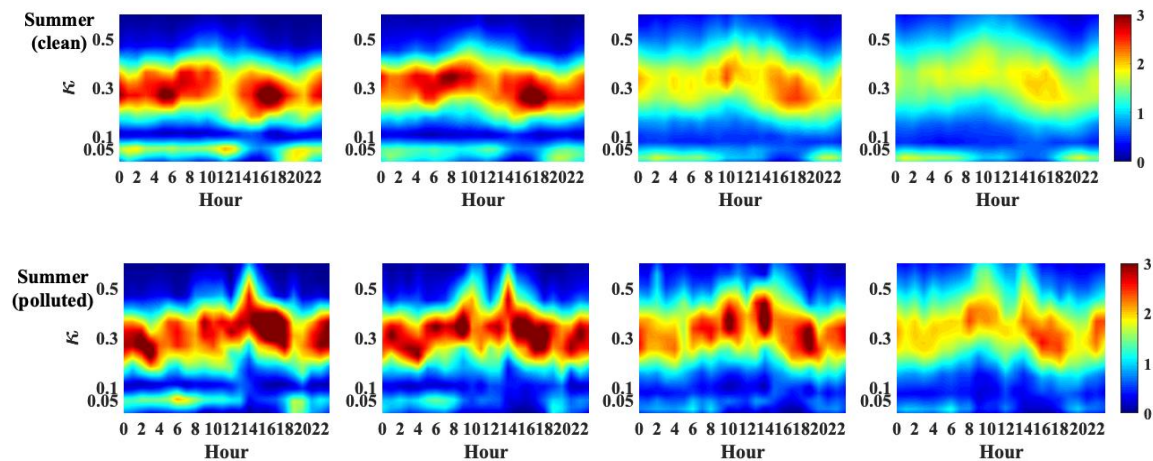

Figure S5. Diurnal cycles of  $\kappa_{gf}$  -PDF for 80, 110, 150 and 200 nm particles under clean and polluted conditions in summer period.

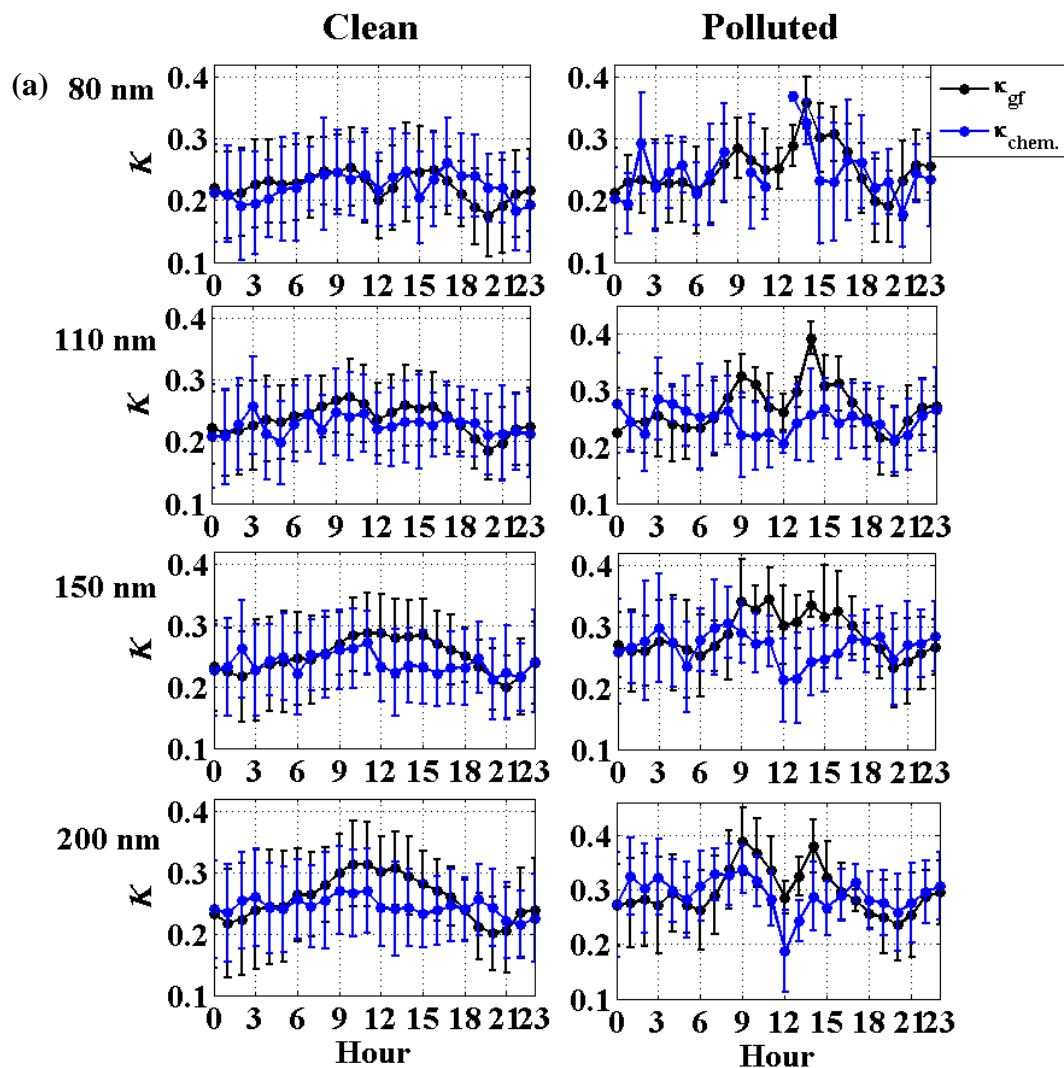

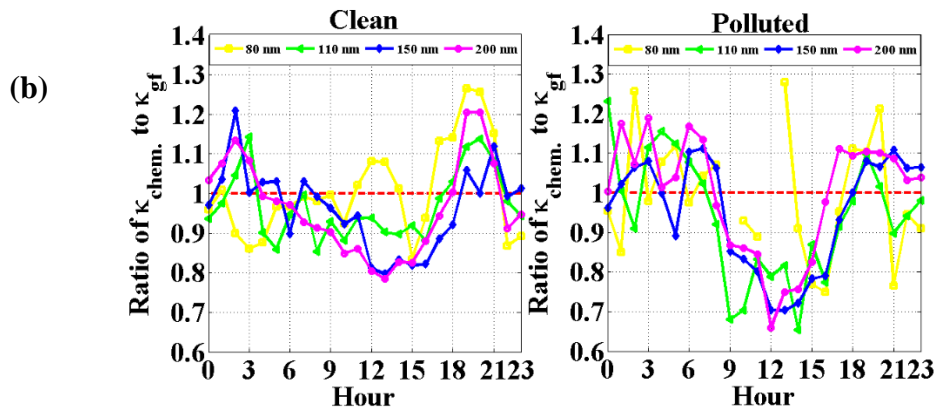

Figure S6. Diurnal variations in (a)  $\kappa_{chem}$  using size-resolved chemical composition data and  $\kappa_{gf}$  in summer period; and (b) ratio of  $\kappa_{chem}$  to  $\kappa_{gf}$  under clean and polluted conditions in summer period.

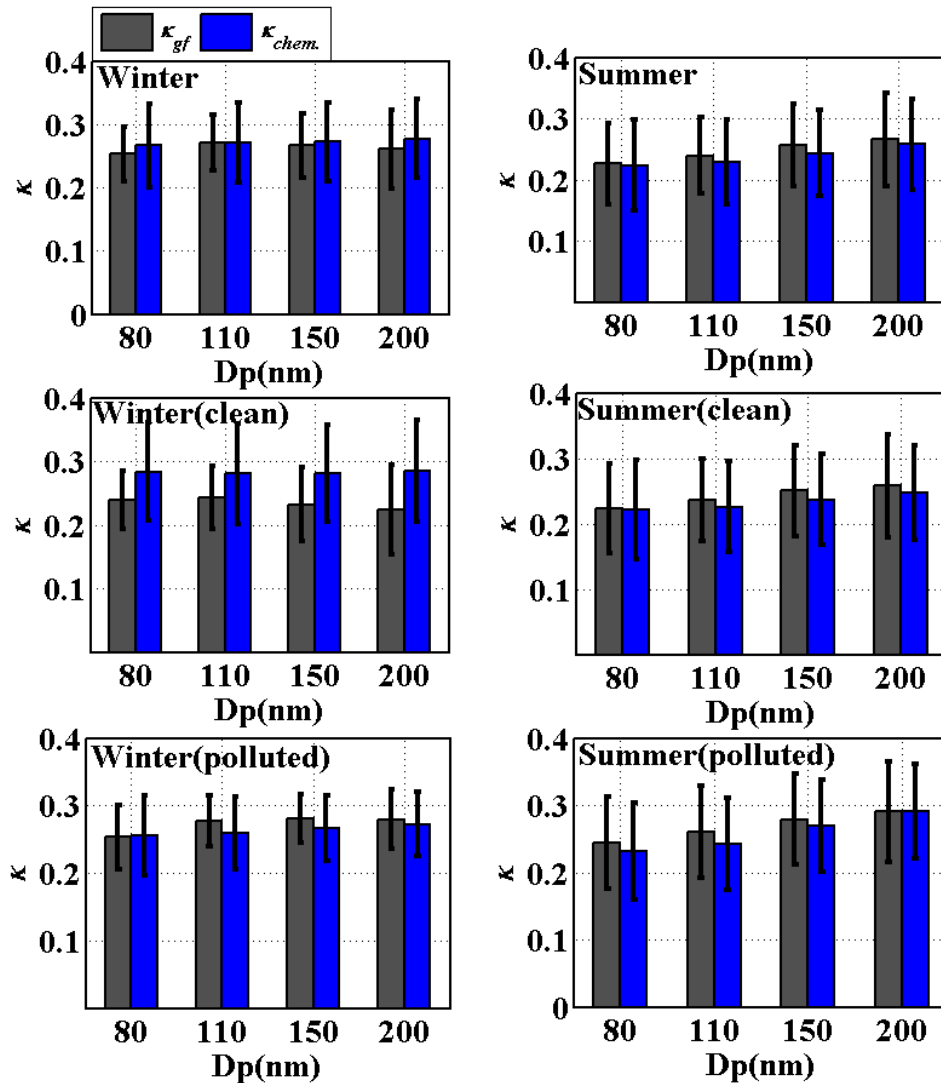

Figure S7. Mean  $\kappa_{chem}$  using size-resolved chemical composition data and  $\kappa_{gf}$  in winter and summer period respectively.

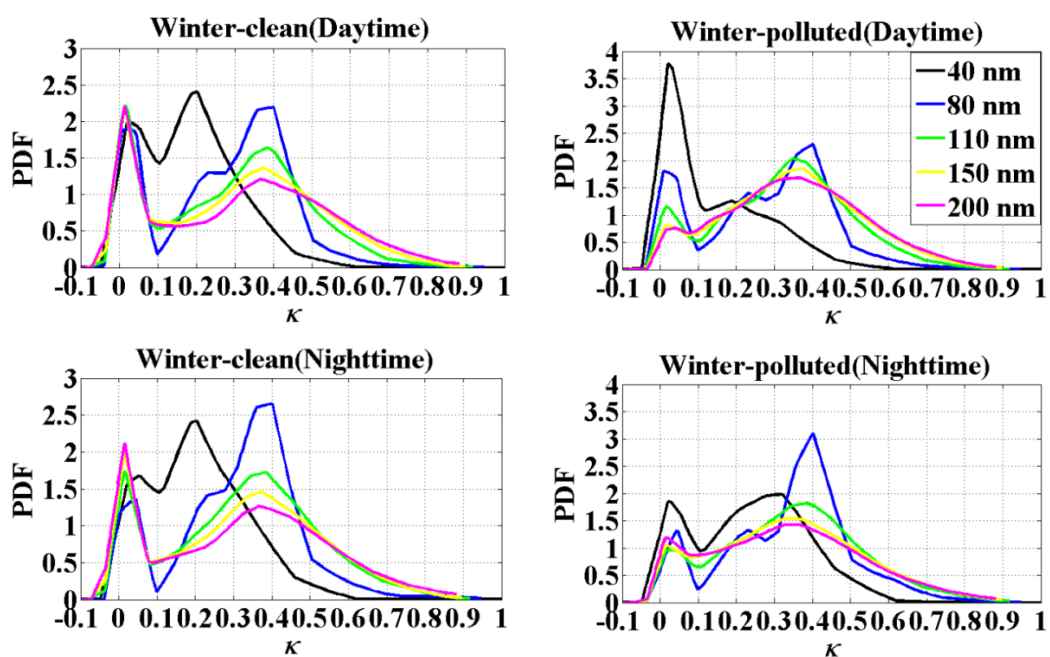

Figure S8. Mean probability density functions of hygroscopicity parameter derived from hygroscopic growth factor for 40, 80, 110, 150, 200 nm during daytime (14:00-19:00 LT) and nighttime (00:00-06:00 LT) under clean and polluted conditions in winter period.

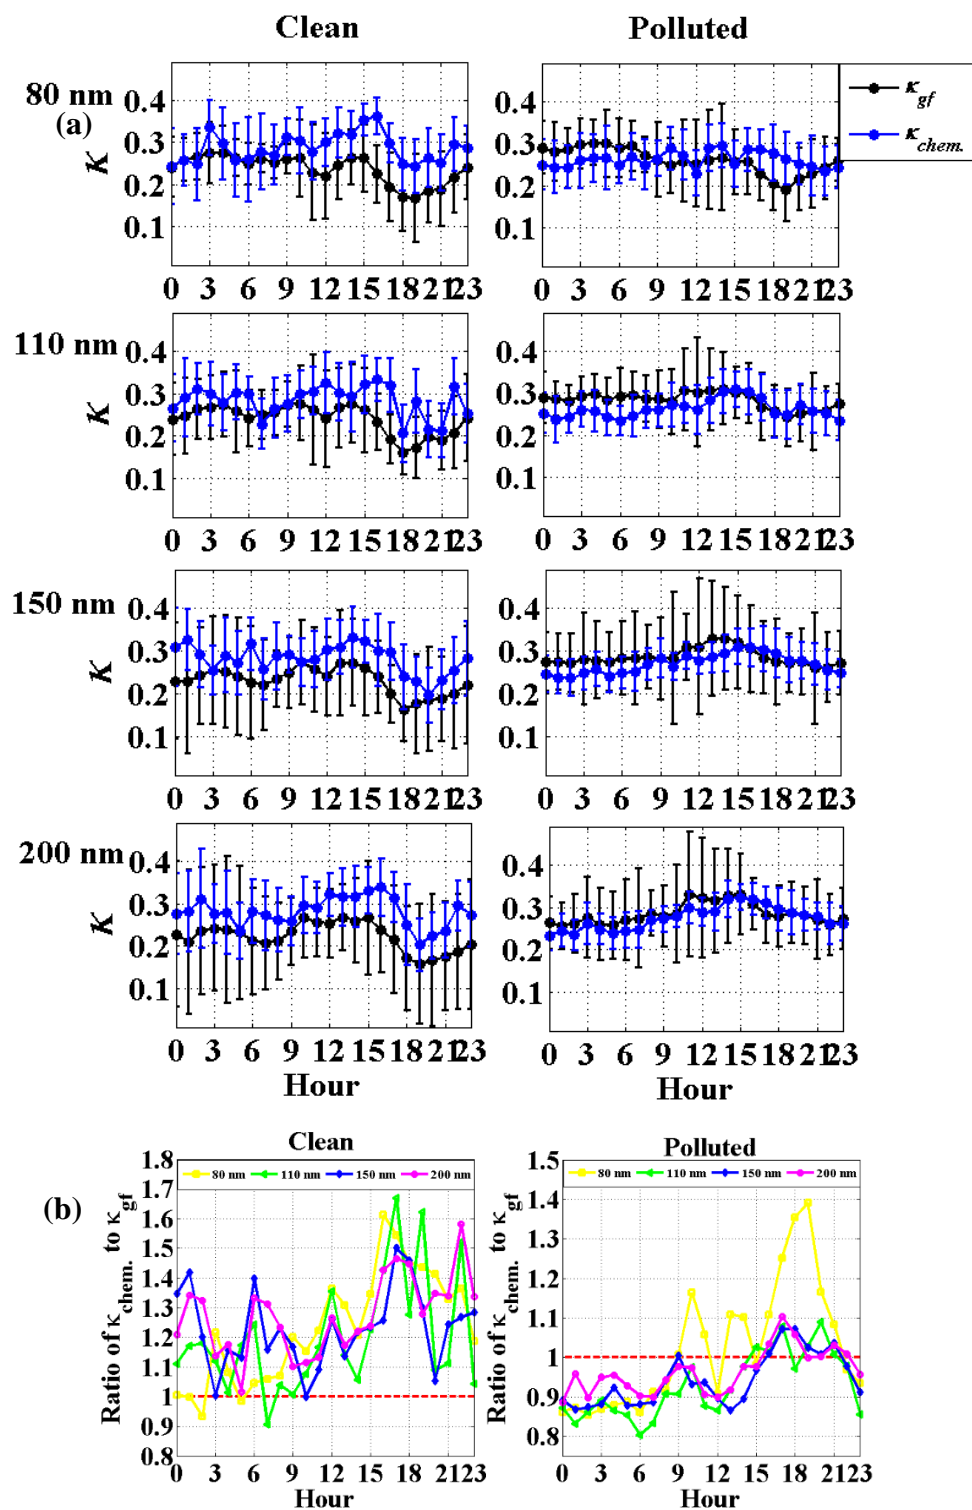

Figure S9. Diurnal variations in (a)  $\kappa_{chem}$  using size-resolved chemical composition data and  $\kappa_{gf}$  in winter period; and (b) ratio of  $\kappa_{chem}$  to  $\kappa_{gf}$  under clean and polluted conditions in winter period.

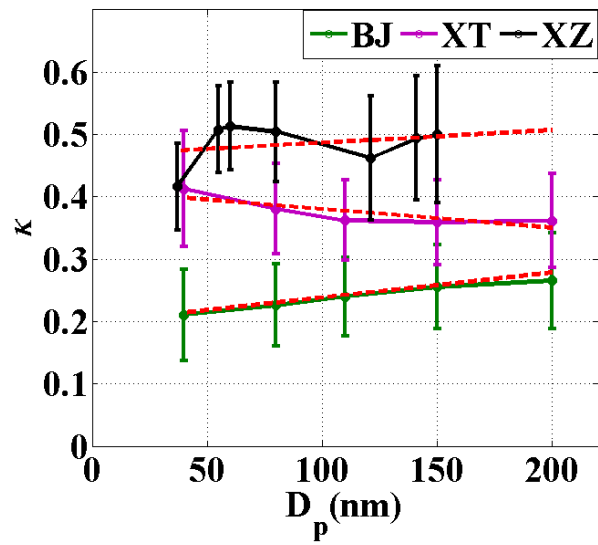

Figure S10. The dependence of  $\kappa$  on  $D_p$  in summer period at BJ, XT, XZ, respectively. The  $\kappa$  at BJ and XT is retrieved from growth factor measured by HTDMA. The  $\kappa$  at XZ is retrieved from critical supersaturation measured by CCNc.
